# Supplementary material
Source: MDPI journal article supplement (https://www.mdpi.com/2073-4441/4/2/345)
Supplement: s1 [file s1]

---

---

## Appendix: Questionnaire for the evaluation of proposed framework of vulnerability assessment

### A. Respondent's Identification:

Name and Surname:

Organization:

Position:

Address:

Email:

### B. generalized framework

1. Evaluate the proposed framework as a whole:

☐ Excellent   ☐ Very good   ☐ Good   ☐ Fair   ☐ Poor   ☐ Very poor

Notes: \_\_\_\_\_  
\_\_\_\_\_  
\_\_\_\_\_

2. To what extent the generalized framework can be useful for water resource decision making in the country, given the current institutional and legislative context?

☐ Excellent   ☐ Very good   ☐ Good   ☐ Fair   ☐ Poor   ☐ Very poor

Please specify:

\_\_\_\_\_  
\_\_\_\_\_  
\_\_\_\_\_

3. To what extent the important steps are incorporated in the framework?

☐ Excellent   ☐ Very good   ☐ Good   ☐ Fair   ☐ Poor   ☐ Very poor

Notes: \_\_\_\_\_  
\_\_\_\_\_  
\_\_\_\_\_

4. According to your opinion which steps of the proposed framework should be added/removed/refined?

\_\_\_\_\_  
\_\_\_\_\_  
\_\_\_\_\_  
\_\_\_\_\_  
\_\_\_\_\_

---

---

---

---

---

---

---

---

C. Lower Brahmaputra River Basin (LBRB in Bangladesh) Context

1. What are the main concerns in terms of vulnerability assessment of water resources system in LBRB (Bangladesh)? (e.g., (a) flooding, (b) water shortage, (c) river bank erosion, (d) navigation problem, etc )

.....

.....

.....

.....

.....

(b) To what extent the framework can address these concerns?

☐ all concern    ☐ most concern    ☐ some concern    ☐ no concern

Notes: \_\_\_\_\_

\_\_\_\_\_

\_\_\_\_\_

2. In terms of vulnerability assessment, which indicators can best represent the problems of LBRB? Please specify, under different dimensions:

| Dimensions    | Potential list of indicators      |
|---------------|-----------------------------------|
| Environmental | Surface water discharge           |
|               | Groundwater availability          |
|               | Forest cover                      |
|               | Loss of land due to erosion       |
|               | Wastewater/ surface water         |
|               | Wetland coverage                  |
|               |                                   |
| Social        | Agriculture demand                |
|               | Domestic water demand             |
|               | Dependency ratio                  |
|               | Population without access to safe |

|               |                                         |
|---------------|-----------------------------------------|
| Economic      | drinking water source/ total population |
|               |                                         |
|               |                                         |
|               |                                         |
|               |                                         |
|               |                                         |
|               |                                         |
|               |                                         |
|               |                                         |
|               |                                         |
| Economic      | Industrial water demand                 |
|               | Agricultural production                 |
|               | Fisheries production                    |
|               | Income per capita                       |
|               | GDP                                     |
|               | Non-agricultural employment             |
|               |                                         |
|               |                                         |
| Institutional | Water governance                        |
|               |                                         |
|               |                                         |

#### D. Conclusions

1. What are the main strengths of the framework?

---



---



---

2. What are the main weaknesses of the framework?

---



---



---
